# Supplementary material for: Synthetic viability genomic screening defines Sae2 function in DNA repair
Source: PubMed Central journal article supplement (PMC4474527; doi:10.15252/embj.201590973), 2015-04-21

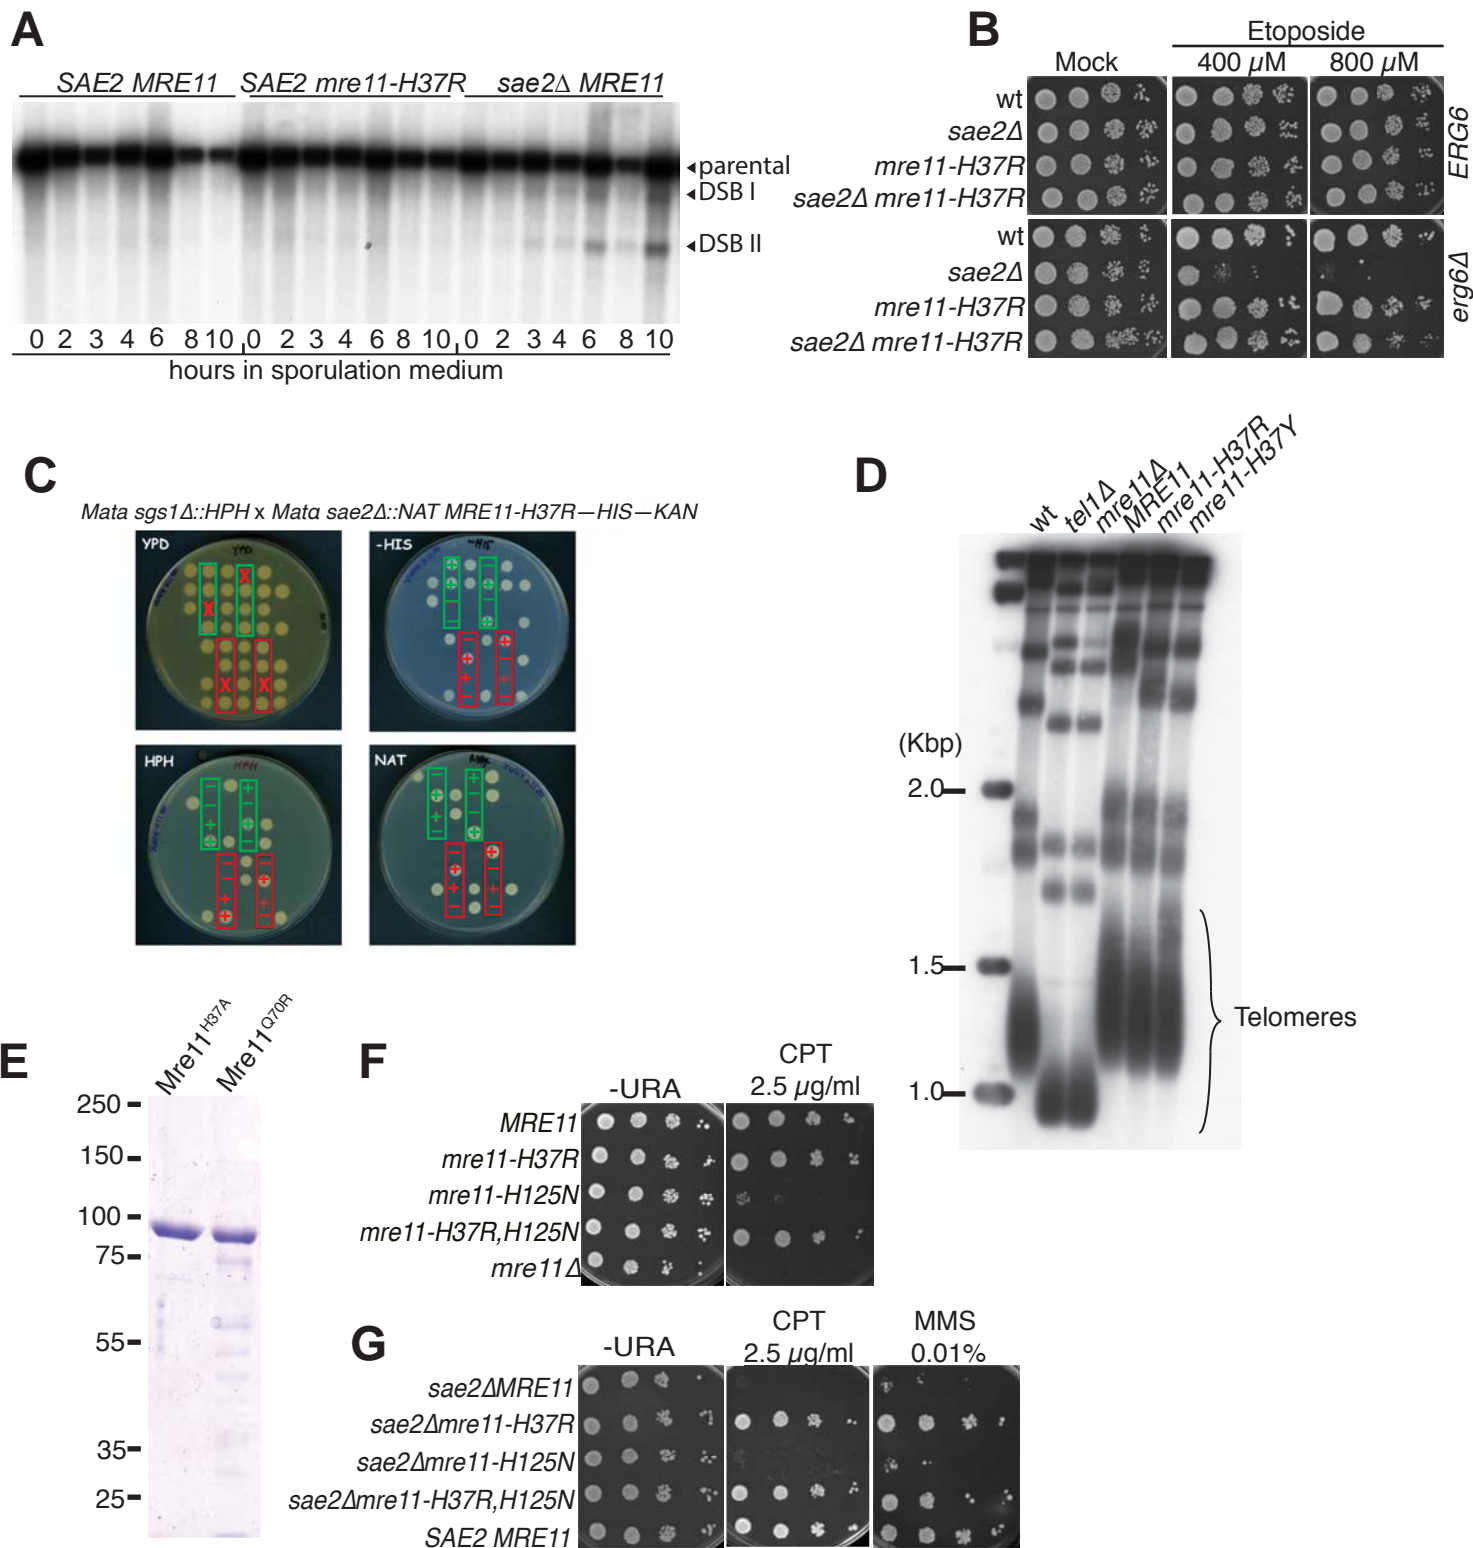

Supplement: embj0034-1509-sd2.pdf [file embj0034-1509-sd2.pdf]
